# Supplementary material
Source: PubMed Central journal article supplement (PMC5794733)
Supplement: ajcr0008-0192-f8.pdf [file ajcr0008-0192-f8.pdf]

# CNALPTC1/miR-30 axis in papillary thyroid cancer

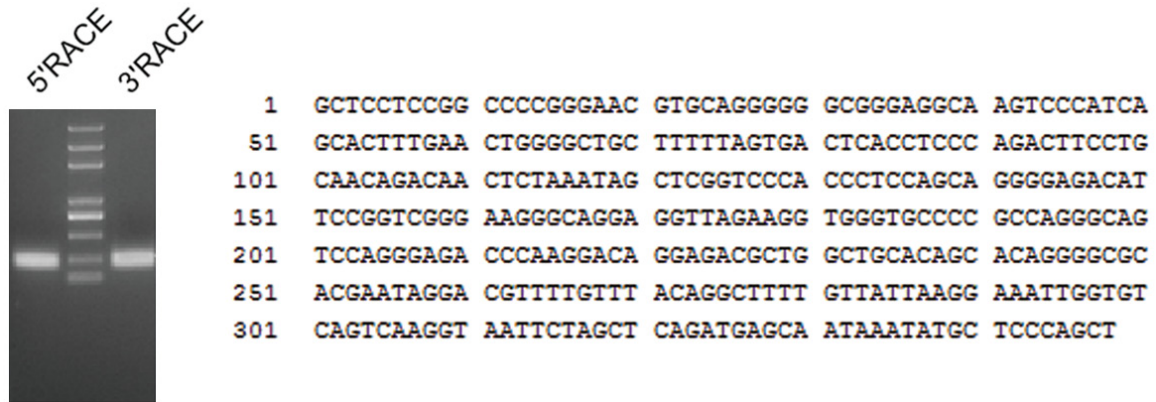

**Supplementary Figure 1.** The full-length sequence of CNALPTC1. Representative images of PCR products from 5'RACE and 3'RACE analyses are shown.
